# Supplementary material for: Consistent elicitation of cross-clade HIV-neutralizing responses achieved in guinea pigs after fusion peptide priming by repetitive envelope trimer boosting
Source: PubMed Central journal article supplement (PMC6469787; doi:10.1371/journal.pone.0215163), 2019-04-17
Supplement: pone.0215163.s002.pdf [file pone.0215163.s002.pdf]

**S2 Table. FP competition of virus neutralization by FP-directed and non-FP-directed antibodies.** FP peptide did not compete with CD4-binding site antibody VRC01 or 241, 289 glycan hole-targeted rabbit antibody 10A, but competed with FP-directed antibodies VRC34.01 and vFP16.02. Antibody neutralizing activity against BG505  $\Delta$ 611 virus was measured in the absence (Media only) or in the presence of 25  $\mu$ g/ml of FP or control FLAG peptide. Reduction of neutralization (Neut) was calculated relative to Media.

| Antibodies | Virus       | Media  | Addition of FP |                   | Addition of FLAG peptide |                   |
|------------|-------------|--------|----------------|-------------------|--------------------------|-------------------|
|            |             | % Neut | % Neut         | Reduction of Neut | % Neut                   | Reduction of Neut |
| VRC01      | BG505.N611Q | 69     | 71             | -3%               | 67                       | 3%                |
| 10A        | BG505.N611Q | 66     | 71             | -7%               | 63                       | 4%                |
| VRC34.01   | BG505.N611Q | 61     | 0              | 100%              | 62                       | 0%                |
| vFP16.02   | BG505.N611Q | 88     | 0              | 100%              | 75                       | 16%               |
