# Supplementary material for: Consistent elicitation of cross-clade HIV-neutralizing responses achieved in guinea pigs after fusion peptide priming by repetitive envelope trimer boosting
Source: PubMed Central journal article supplement (PMC6469787; doi:10.1371/journal.pone.0215163), 2019-04-17
Supplement: pone.0215163.s003.pdf [file pone.0215163.s003.pdf]

**S3 Table. Mapping of autologous BG505 neutralization to glycan holes at 241 or 289.**

Neutralizing activity was measured as ID<sub>50</sub> for each indicated guinea pig serum against BG505 virus, or BG505 S241N or P291S mutants, which restored glycans at N241 or N289, colored similarly as in Figs. 1 and 2. A reduction of serum-neutralizing activity on glycan-restored mutants relative to glycan-hole BG505 virus that was larger than 50% was defined as significant (highlighted in green).

| Virus    | BG505 | BG505 S241N | Reduction | N241 glycan hole targeted | BG505 T332N | BG505 T332N P291S | Reduction | N289 glycan hole targeted | N241 or N289 glycan hole targeted |
|----------|-------|-------------|-----------|---------------------------|-------------|-------------------|-----------|---------------------------|-----------------------------------|
| CGP701-1 | 649   | 118         | 82%       | Yes                       | 149         | 72                | 52%       | Yes                       | Yes                               |
| CGP701-2 | 6,932 | 5,592       | 19%       | No                        | 5,183       | 2,497             | 52%       | Yes                       | Yes                               |
| CGP701-3 | 8,189 | 8,801       | -7%       | No                        | 5,875       | 4,094             | 30%       | No                        | No                                |
| CGP701-4 | 598   | 219         | 63%       | Yes                       | 270         | 260               | 4%        | No                        | Yes                               |
| CGP701-5 | 294   | 112         | 62%       | Yes                       | 370         | 90                | 76%       | Yes                       | Yes                               |
